# Supplementary material
Source: Springer Nature journal article supplement (https://www.springermedizin.de/resource/supplementary/13063_2013_1466_MOESM6_ESM.pdf/9620072)
Supplement: MOESM6 [file 9620072]

# ADAPT Triple Negative

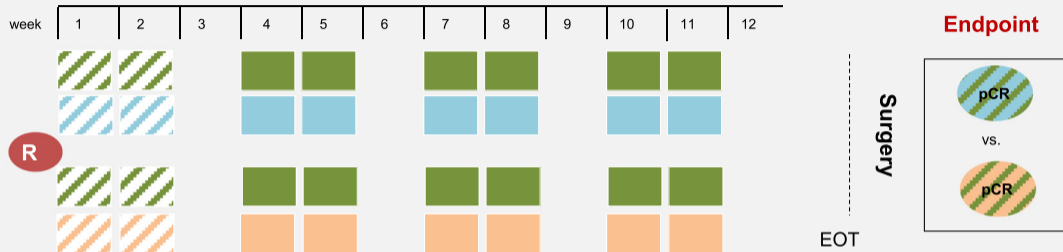

## ADAPT Umbrella

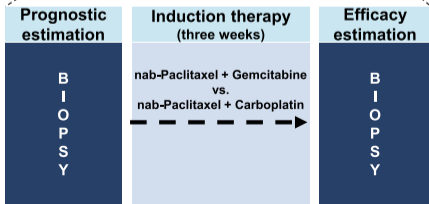

 nab-Paclitaxel  
125 mg/m<sup>2</sup>

 Carboplatin  
AUC2

 Gemcitabine  
1000 mg/m<sup>2</sup>
